# Supplementary material for: Berberine may rescue Fusobacterium nucleatum-induced colorectal tumorigenesis by modulating the tumor microenvironment
Source: PubMed Central journal article supplement (PMC4741656; doi:10.18632/oncotarget.5166), 2015-09-12
Supplement: oncotarget-06-32013-s001.pdf [file oncotarget-06-32013-s001.pdf]

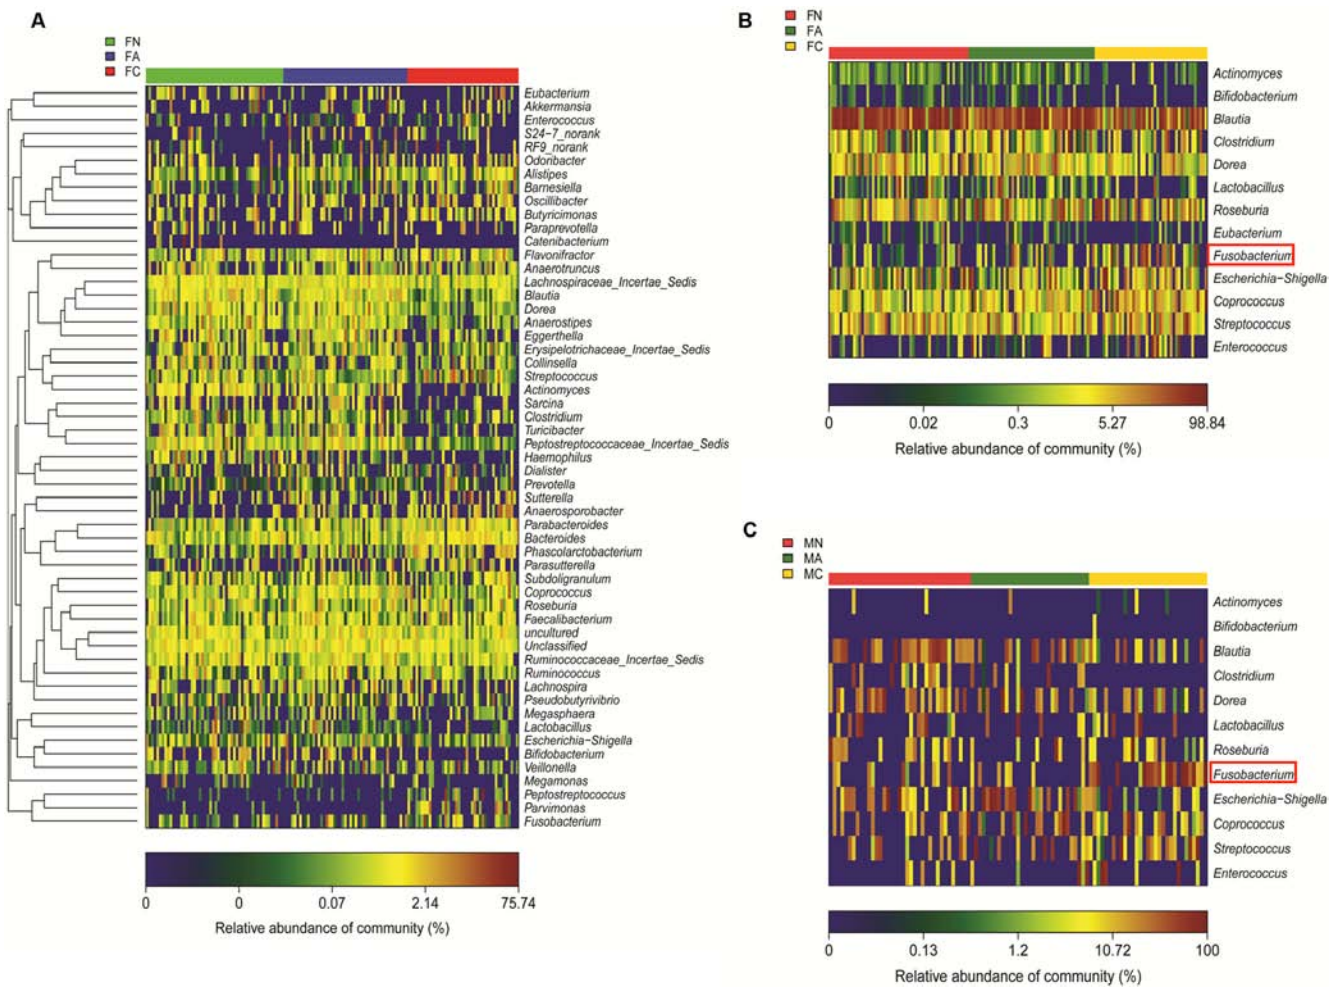

**Supplementary Figure S2: The Heatmap of gut microbiota distribution in the genera level.** A. The Heatmap of gut microbiota distribution in lumen microbiota in FN ( $n = 52$ ), FA ( $n = 47$ ) and FC ( $n = 42$ ) groups. B. Significant differences of 15 genera identified in lumen microbiota in FN ( $n = 52$ ), FA ( $n = 47$ ) and FC ( $n = 42$ ) groups. C. Significant differences of 15 genera identified in mucosa microbiota in MN ( $n = 37$ ), MA ( $n = 30$ ) and MC ( $n = 31$ ) groups.

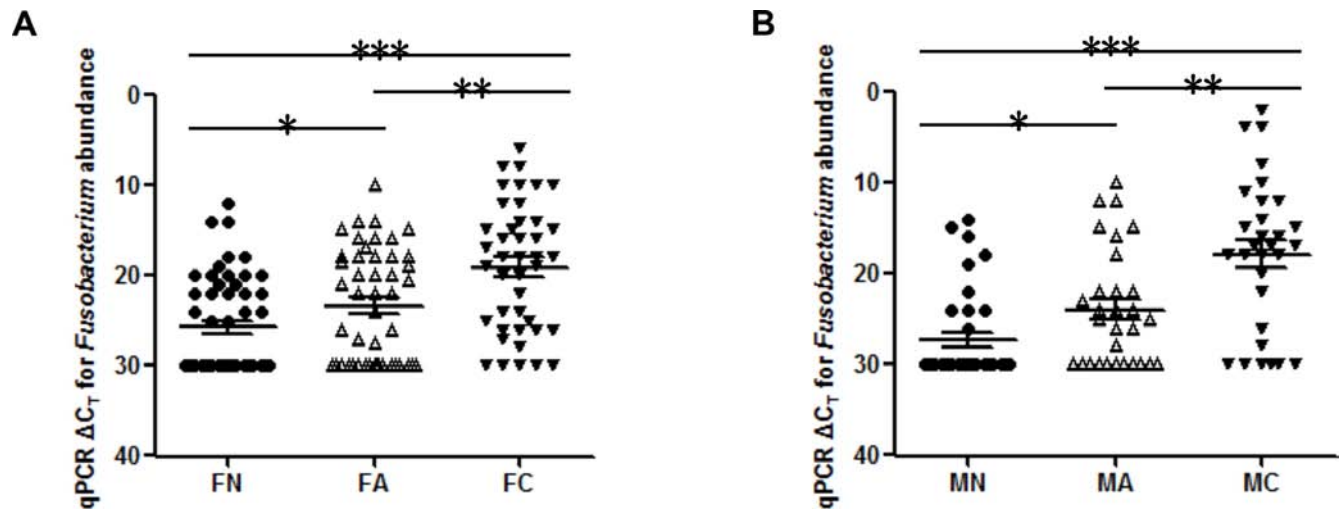

**Supplementary Figure S3: Relative abundance of *Fusobacterium nucleatum* in feces or colonic tissues from control subjects or subjects suffered with CRA or CRC.** The data shown are mean  $C_T$  values from three independent experiments. **A.** Relative abundance of *Fusobacterium nucleatum* in feces from FN ( $n = 52$ ), FA ( $n = 47$ ) and FC ( $n = 42$ ). **B.** Relative abundance of *Fusobacterium nucleatum* in colonic tissues from MN ( $n = 37$ ), MA ( $n = 30$ ) and MC ( $n = 31$ ). Two-sided  $P$ -values 0.05 were considered statistically significant. \* means  $P < 0.05$ ; \*\* means  $P < 0.01$ ; \*\*\* means  $P < 0.001$ .
